# Supplementary material for: Seroprevalence and molecular surveillance of Dirofilaria immitis in shelter dogs from central New Mexico, US
Source: Research Square preprint supplement (doi:10.21203/rs.3.rs-8614198/v1), 2026-02-02
Supplement: Supplementary file 1 [file 0c27171787d6fea31d1f07e3.docx]

**Table 1.**  Summary of the optical density (O.D.) values reported for all antigen-positive dogs from Albuquerque, New Mexico (n=402).

| Sample No. | O.D. Values of DiroCHEK® | | | |
| --- | --- | --- | --- | --- |
| Pre-ICD | Post-ICD | Positive control | Negative control |
| 39 | 0.134 | 0.183 | 0.104 | 0.053 |
| 136* | - | 0.670 | 0.135 | 0.056 |
| 168 | 0.105 | 0.122 | 0.110 | 0.056 |
| 174 | - | 0.053 | 0.077 | 0.049 |
| 189 | - | 0.053 | 0.077 | 0.049 |
| 275 | 0.048 | 0.072 | 0.071 | 0.046 |
| 291 | - | 0.049 | 0.061 | 0.045 |
| 292 | 0.055 | 0.060 | 0.061 | 0.045 |
| 300 | - | 0.049 | 0.061 | 0.045 |
| 309* | - | 0.058 | 0.138 | 0.055 |
| 341† | - | 0.074 | 0.136 | 0.060 |
| 343† | - | 0.062 | 0.136 | 0.060 |
| 354 | - | 0.047 | 0.056 | 0.045 |
| 371 | - | 0.051 | 0.063 | 0.047 |

**Cercopithifilaria bainae* co-infection*;* †*Onchocerca lupi* co-infection, as per Kelly et al. [28].

**Table 2**. Summary of demographic characteristics of the sampled dog population from Albuquerque, New Mexico (n=402).

| Variable | Total No. | *Dirofilaria immitis*  *Pre-ICD Positive* | | |  | *Dirofilaria immitis*  *Post-ICD Positive* | | |
| --- | --- | --- | --- | --- | --- | --- | --- | --- |
| No. (%) | 95% CI | Fisher’s exact |  | No. (%) | 95% CI | Chi-square  df  *p*-value |
| Age | | | | | | | | |
| Juvenile  (≤1 year old) | 120 | 1 (0.8) | 0.0—4.6 | 1.000 | 6 (5.0) | | 1.9—10.6 | 1.771  2  0.412 |
| Adult  (>1-7 years old) | 259 | 3 (1.2) | 0.2—3.4 | 8 (3.1) | | 0.4—6.1 |
| Senior  (>7 years old) | 23 | 0 | - | 0 | | - |
| Sex | | | | | | | | |
| Female | 193 | 2 (1.0) | 0.1—3.7 | 0.658* | 10 (5.2) | | 2.5—9.3 | 3.187  1  0.074 |
| Male | 209 | 2 (1.0) | 0.1—3.4 |  | 4 (1.9) | 0.5—4.8 |
| American Kennel Club Breed Group | | | | | | | | |
| Herding group | 88 | 1 (1.1) | 0.0—6.2 | 0.365 |  | 3 (3.4) | 0.7—9.6 | 6.066  8  0.640 |
| Hound group | 16 | 0 | - |  | 0 | - |
| Non-sporting group | 32 | 0 | - |  | 1 (3.1) | 0.0—16.2 |
| Sporting group | 18 | 1 (5.6) | 0.1—27.3 |  | 2 (11.1) | 1.4—34.7 |
| Terrier group | 101 | 0 | - |  | 2 (2.0) | 0.2—7.0 |
| Toy group | 92 | 1 (1.1) | 0.0—5.9 |  | 5 (5.4) | 1.8—12.2 |
| Working group | 41 | 1 (2.4) | 0.0—12.9 |  | 1 (2.4) | 0.0—12.9 |
| Miscellaneous | 12 | 0 | - |  | 0 | - |
| Unknown | 2 | 0 | - |  | 0 | - |
| Coat Color | | | | | | | | |
| Single Color | 132 | 1 (0.8) | 0.0—4.1 | 0.601* |  | 4 (3.0) | 0.8—7.6 | 0.119  1  0.729 |
| Multiple Colors | 270 | 3 (1.1) | 0.2—3.1 |  | 10 (3.7) | 1.8—6.7 |

*Abbreviations: *1-sided Fisher’s exact; df: degrees of freedom; CI: Confidence Interval;*
